# Supplementary material
Source: publisher figshare collection journal article supplement (https://springernature.figshare.com/ndownloader/files/7044371)

Precise repair of *mPing* excision sites is facilitated by target site duplication derived microhomology

David M. Gilbert, M. Catherine Bridges, Ashley E. Strother, Courtney E. Burckhalter, James M. Burnette III, and C. Nathan Hancock

#### Additional file 1

##### Time course of a yeast transposition assay

*ADE2* revertant frequencies for *mPing* in the JIM17 strain of yeast. Error bars represent the standard error for six replicates.

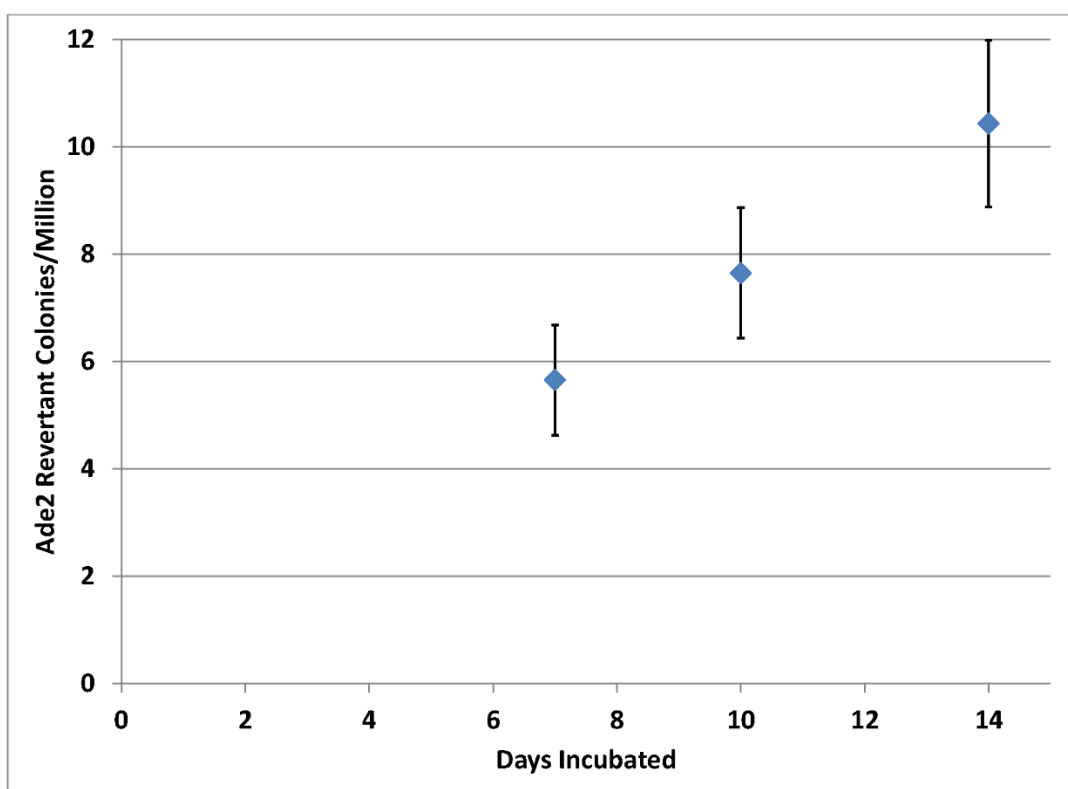

Supplement: Supplementary file [file 7044371]
